# Supplementary material for: Heart failure potentially affects the cortical structure of the brain
Source: publisher site journal article supplement (doi:10.18632/aging.205762), 2024-04-22
Supplement: Supplementary file [file aging-v16i8-205762-supplementary-material-SD2.pdf]

## SUPPLEMENTARY TABLES

**Supplementary Table 1. Basic information of SNPs associated with heart failure.**

| SNPs        | other_allele | effect_allele | $\beta$ | SE     | P        |
|-------------|--------------|---------------|---------|--------|----------|
| rs55751848  | C            | G             | -0.0425 | 0.0089 | 1.79E-06 |
| rs593467    | G            | A             | -0.0548 | 0.0118 | 3.42E-06 |
| rs660240    | T            | C             | 0.0611  | 0.0097 | 3.00E-10 |
| rs35054810  | G            | A             | 0.0725  | 0.0143 | 3.98E-07 |
| rs7559452   | A            | G             | 0.0468  | 0.0102 | 4.47E-06 |
| rs17496249  | A            | G             | -0.0372 | 0.0079 | 2.49E-06 |
| rs12477245  | C            | T             | 0.1192  | 0.0236 | 4.40E-07 |
| rs7369998   | G            | A             | -0.059  | 0.0126 | 2.83E-06 |
| rs72844714  | C            | A             | 0.0559  | 0.0121 | 3.84E-06 |
| rs80087882  | G            | A             | 0.0609  | 0.0125 | 1.10E-06 |
| rs4376020   | T            | A             | -0.0612 | 0.0123 | 6.50E-07 |
| rs9815816   | T            | C             | 0.0479  | 0.0099 | 1.31E-06 |
| rs10938398  | G            | A             | 0.0389  | 0.008  | 1.16E-06 |
| rs11722972  | T            | G             | -0.0519 | 0.0114 | 5.30E-06 |
| rs2634071   | T            | C             | -0.0923 | 0.0101 | 6.33E-20 |
| rs11745324  | G            | A             | -0.0528 | 0.0095 | 2.73E-08 |
| rs7766436   | C            | T             | 0.04    | 0.0086 | 3.30E-06 |
| rs4135240   | T            | C             | -0.0486 | 0.0084 | 7.22E-09 |
| rs6922885   | T            | C             | -0.0377 | 0.008  | 2.45E-06 |
| rs55949718  | C            | T             | -0.0685 | 0.0142 | 1.41E-06 |
| rs1510226   | T            | C             | 0.162   | 0.0285 | 1.31E-08 |
| rs55730499  | C            | T             | 0.1058  | 0.0157 | 1.60E-11 |
| rs117925145 | A            | G             | 0.1797  | 0.0391 | 4.31E-06 |
| rs76117960  | T            | C             | 0.0528  | 0.0113 | 2.97E-06 |
| rs35005436  | T            | C             | 0.0533  | 0.0116 | 4.33E-06 |
| rs10952517  | T            | A             | -0.0394 | 0.0085 | 3.56E-06 |
| rs73200714  | G            | A             | -0.055  | 0.0118 | 3.15E-06 |
| rs2980858   | T            | C             | -0.04   | 0.0086 | 3.30E-06 |
| rs7859727   | C            | T             | 0.0623  | 0.0078 | 1.38E-15 |
| rs600038    | T            | C             | 0.0569  | 0.0096 | 3.08E-09 |
| rs994980    | C            | T             | 0.0375  | 0.0081 | 3.66E-06 |
| rs72807031  | T            | A             | -0.0895 | 0.0181 | 7.62E-07 |
| rs4746140   | G            | C             | -0.0666 | 0.0109 | 9.96E-10 |
| rs10882816  | G            | T             | -0.0447 | 0.0085 | 1.45E-07 |
| rs17617337  | C            | T             | -0.0561 | 0.0095 | 3.52E-09 |
| rs61733868  | T            | C             | -0.1057 | 0.0216 | 9.90E-07 |
| rs186973337 | T            | A             | 0.0933  | 0.0196 | 1.93E-06 |
| rs4755717   | C            | G             | -0.0379 | 0.008  | 2.16E-06 |
| rs10459012  | C            | A             | 0.0458  | 0.0095 | 1.43E-06 |
| rs12805761  | A            | T             | -0.0672 | 0.0139 | 1.33E-06 |
| rs4766578   | T            | A             | -0.0433 | 0.0079 | 4.23E-08 |
| rs10846742  | G            | A             | -0.0506 | 0.0111 | 5.15E-06 |
| rs8017852   | C            | A             | -0.0554 | 0.012  | 3.90E-06 |
| rs10150022  | A            | G             | -0.0419 | 0.0087 | 1.46E-06 |

|            |   |   |         |        |          |
|------------|---|---|---------|--------|----------|
| rs17483686 | A | T | 0.0489  | 0.0095 | 2.64E-07 |
| rs56094641 | A | G | 0.0454  | 0.008  | 1.39E-08 |
| rs578065   | T | G | 0.0408  | 0.0082 | 6.50E-07 |
| rs12940636 | T | C | -0.0381 | 0.0083 | 4.42E-06 |
| rs8081247  | G | A | -0.0487 | 0.0098 | 6.72E-07 |
| rs1788761  | A | G | -0.0425 | 0.009  | 2.33E-06 |
| rs11874705 | A | G | 0.0469  | 0.0098 | 1.70E-06 |
| rs10520390 | C | G | -0.0902 | 0.0187 | 1.41E-06 |

**Supplementary Table 2. MR results of the effect of heart failure on the cortical structure of functional cerebral areas.**

|                            | SA              | TH         |
|----------------------------|-----------------|------------|
|                            | Global weighted |            |
| Bankssts                   | 0.6977748       | 0.9969515  |
| Caudal anterior cingulate  | 0.1879553       | 0.9944418  |
| Caudal middle frontal      | 0.009369889     | 0.4861102  |
| Cuneus                     | 0.93282         | 0.3884087  |
| Entorhinal                 | 0.7375308       | 0.4824811  |
| Frontal pole               | 0.6806647       | 0.9700872  |
| Fusiform                   | 0.5006216       | 0.8486323  |
| Inferior parietal          | 0.8200912       | 0.2974922  |
| Inferior temporal          | 0.9055626       | 0.1172891  |
| Insula                     | 0.01088126      | 0.2536509  |
| Isthmus cingulate          | 0.7616352       | 0.8956049  |
| Lateral occipital          | 0.740052        | 0.6561721  |
| Lateral orbitofrontal      | 0.5156932       | 0.1242299  |
| Lingual                    | 0.7964685       | 0.3125903  |
| Medial orbitofrontal       | 0.06407264      | 0.6340118  |
| Middle temporal            | 0.5498127       | 0.6994723  |
| Paracentral                | 0.6369187       | 0.6598778  |
| Parahippocampal            | 0.6559629       | 0.7828665  |
| Pars opercularis           | 0.8144172       | 0.6971543  |
| Par orbitalis              | 0.6418063       | 0.4258328  |
| Pars triangularis          | 0.9436559       | 0.5506617  |
| Pericalcarine              | 0.9299025       | 0.4058616  |
| Postcentral                | 0.6802846       | 0.8207215  |
| Posterior cingulate        | 0.9478465       | 0.3376118  |
| Precentral                 | 0.7710834       | 0.773043   |
| Precuneus                  | 0.0496107       | 0.3306158  |
| Rostral anterior cingulate | 0.3899105       | 0.6066478  |
| Rostral middle frontal     | 0.3578567       | 0.2814057  |
| Superior frontal           | 0.66020664      | 0.5205543  |
| Superior parietal          | 0.9424974       | 0.04477682 |
| Superior temporal          | 0.2498117       | 0.843193   |
| Supramarginal              | 0.1505051       | 0.4930569  |
| Temporal pole              | 0.09355074      | 0.6033848  |
| Transverse temporal        | 0.9531146       | 0.1976769  |

**Supplementary Table 3. MR pleiotropic analysis of cortical thickness in cerebral functional areas in heart failure patients.**

| <b>Cerebral cortex</b>     | <b>Egger-intercept</b> | <b>SE</b>   | <b>P</b>  |
|----------------------------|------------------------|-------------|-----------|
| Bankssts                   | -0.000151779           | 0.000882834 | 0.8643876 |
| Caudal anterior cingulate  | 0.000487773            | 0.00104738  | 0.6440152 |
| Caudal middle frontal      | -0.000299749           | 0.000605053 | 0.623091  |
| Cuneus                     | -0.000922428           | 0.000574205 | 0.1162442 |
| Entorhinal                 | -0.002141749           | 0.001745485 | 0.22717   |
| Frontal pole               | 0.000195246            | 0.001289201 | 0.8804034 |
| Fusiform                   | -0.000658134           | 0.000539236 | 0.2296064 |
| Inferior parietal          | 0.000226421            | 0.0004656   | 0.6294766 |
| Inferior temporal          | -0.0002893             | 0.000607283 | 0.6364592 |
| Insula                     | -0.000799705           | 0.000735893 | 0.2838346 |
| Isthmus cingulate          | 0.000161048            | 0.000943923 | 0.865408  |
| Lateral occipital          | 0.000234886            | 0.000612812 | 0.7035848 |
| Lateral orbitofrontal      | -0.000424334           | 0.000596338 | 0.4809688 |
| Lingual                    | 0.000286671            | 0.000493235 | 0.5644465 |
| Medial orbitofrontal       | -0.000220342           | 0.000722794 | 0.7621033 |
| Middle temporal            | 0.000546603            | 0.000566318 | 0.3403976 |
| Paracentral                | -0.000464085           | 0.000608095 | 0.4499489 |
| Parahippocampal            | -0.000661862           | 0.001500857 | 0.6616559 |
| Pars opercularis           | -0.00073961            | 0.000494173 | 0.1425313 |
| Pars orbitalis             | -0.000512167           | 0.0008384   | 0.5448189 |
| Pars triangularis          | 0.000264559            | 0.000619918 | 0.671898  |
| Pericalcarine              | 0.000108325            | 0.000558845 | 0.847309  |
| Postcentral                | -6.45318E-05           | 0.000631108 | 0.9190809 |
| Posterior cingulate        | 0.000420647            | 0.000618175 | 0.5002296 |
| Precentral                 | 6.53192E-05            | 0.000544684 | 0.9051611 |
| Precuneus                  | -0.000272092           | 0.000417158 | 0.5180639 |
| Rostral anterior cingulate | -0.000270701           | 0.000929568 | 0.7724327 |
| Rostral middle frontal     | 0.000424245            | 0.000443086 | 0.3442245 |
| Superior frontal           | -0.000272435           | 0.000581861 | 0.6422378 |
| Superior parietal          | 2.09165E-05            | 0.000411503 | 0.9597207 |
| Superior temporal          | -0.000939761           | 0.000581243 | 0.1139801 |
| Supramarginal              | 6.47205E-06            | 0.00040376  | 0.9872926 |
| Temporal pole              | -0.000355457           | 0.001417925 | 0.803371  |
| Transverse temporal        | -0.000251782           | 0.000907365 | 0.7828721 |

**Supplementary Table 4. MR pleiotropic analysis of cortical surface area of cerebral functional area in heart failure.**

| <b>Cerebral cortex</b>     | <b>Egger-intercept</b> | <b>SE</b> | <b>P</b>   |
|----------------------------|------------------------|-----------|------------|
| Bankssts                   | -0.5550066             | 0.6080988 | 0.3670126  |
| Caudal anterior cingulate  | -1.047564              | 0.6136488 | 0.09575322 |
| Caudal middle frontal      | -1.608463              | 1.42652   | 0.2664022  |
| Cuneus                     | 0.03487043             | 0.8842244 | 0.9687438  |
| Entorhinal                 | -0.1806707             | 0.3692631 | 0.6273886  |
| Frontal pole               | -0.1204245             | 0.189236  | 0.5282514  |
| Fusiform                   | -1.631361              | 1.515063  | 0.2882028  |
| Inferior parietal          | 2.67364                | 2.543369  | 0.2996279  |
| Inferior temporal          | -0.6900998             | 1.686612  | 0.684658   |
| Insula                     | 1.182193               | 0.8740075 | 0.1839702  |
| Isthmus cingulate          | -0.4546133             | 0.8927734 | 0.613471   |
| Lateral occipital          | 0.3568113              | 2.634551  | 0.8929643  |
| Lateral orbitofrontal      | 0.03948283             | 1.03887   | 0.9698771  |
| Lingual                    | 0.2514821              | 1.712191  | 0.8839855  |
| Medial orbitofrontal       | 0.4619694              | 0.703708  | 0.5153712  |
| Middle temporal            | -0.2951111             | 1.265819  | 0.8168732  |
| Paracentral                | 0.04591706             | 0.8976835 | 0.9594666  |
| Parahippocampal            | 0.5518967              | 0.394956  | 0.1702041  |
| Pars opercularis           | -0.3101397             | 1.105776  | 0.7805976  |
| Pars orbitalis             | -0.3421035             | 0.321653  | 0.2940605  |
| Pars triangularis          | -0.7926667             | 0.8503531 | 0.356988   |
| Pericalcarine              | -0.04470478            | 1.03377   | 0.9657274  |
| Postcentral                | -0.9813764             | 1.542445  | 0.5283318  |
| Posterior cingulate        | -0.68538               | 0.9402103 | 0.4703785  |
| Precentral                 | -2.642603              | 2.116006  | 0.2191595  |
| Precuneus                  | 1.577018               | 1.865732  | 0.4031248  |
| Rostral anterior cingulate | -0.5860225             | 0.6358936 | 0.3624173  |
| Rostral middle frontal     | -2.219558              | 2.060125  | 0.2879254  |
| Superior frontal           | 5.515524               | 2.069316  | 0.01112991 |
| Superior parietal          | 1.161043               | 2.1021    | 0.5838773  |
| Superior temporal          | -1.075803              | 1.45459   | 0.4639763  |
| Supramarginal              | 0.5605873              | 1.683823  | 0.7409738  |
| Temporal pole              | -0.2244677             | 0.2469013 | 0.3688609  |
| Transverse temporal        | -0.1623271             | 0.3284371 | 0.6239085  |

**Supplementary Table 5. MR sensitivity analysis of cortical thickness in cerebral functional areas in heart failure patients.**

| <b>Cerebral cortex</b>    | <b>Method</b>             | <b>Cochran's Q</b> | <b>P</b>    |
|---------------------------|---------------------------|--------------------|-------------|
| Bankssts                  | MR-Egger                  | 75.7908            | 0.00037696  |
|                           | Inverse variance weighted | 75.84828           | 0.000533208 |
| Caudal anterior cingulate | MR-Egger                  | 33.69524           | 0.7101431   |
|                           | Inverse variance weighted | 33.91213           | 0.7398873   |
| Caudal middle frontal     | MR-Egger                  | 56.01457           | 0.03798923  |
|                           | Inverse variance weighted | 56.36708           | 0.04463329  |
| Cuneus                    | MR-Egger                  | 35.3256            | 0.6382164   |
|                           | Inverse variance weighted | 37.90626           | 0.5648783   |
| Entorhinal                | MR-Egger                  | 45.01153           | 0.2347797   |
|                           | Inverse variance weighted | 46.74919           | 0.2149053   |
| Frontal pole              | MR-Egger                  | 51.17802           | 0.09164378  |
|                           | Inverse variance weighted | 51.20812           | 0.11026081  |
| Fusiform                  | MR-Egger                  | 33.8945            | 0.7015977   |
|                           | Inverse variance weighted | 35.3841            | 0.6779649   |
| Inferior parietal         | MR-Egger                  | 54.50738           | 0.05060953  |
|                           | Inverse variance weighted | 54.8379            | 0.05916865  |
| Inferior temporal         | MR-Egger                  | 37.05187           | 0.559015    |
|                           | Inverse variance weighted | 37.27881           | 0.593428    |
| Insula                    | MR-Egger                  | 54.74393           | 0.04841658  |
|                           | Inverse variance weighted | 56.40161           | 0.04434429  |
| Isthmus cingulate         | MR-Egger                  | 43.8885            | 0.272001    |
|                           | Inverse variance weighted | 43.92134           | 0.3089267   |
| Lateral occipital         | MR-Egger                  | 66.80433           | 0.003656039 |
|                           | Inverse variance weighted | 67.05598           | 0.004675132 |
| Lateral orbitofrontal     | MR-Egger                  | 37.63968           | 0.5319041   |
|                           | Inverse variance weighted | 38.14601           | 0.5539554   |
| Lingual                   | MR-Egger                  | 25.74057           | 0.9492973   |
|                           | Inverse variance weighted | 26.07837           | 0.9562573   |
| Medial orbitofrontal      | MR-Egger                  | 43.73081           | 0.2775087   |
|                           | Inverse variance weighted | 43.83502           | 0.3121266   |
| Middle temporal           | MR-Egger                  | 35.21808           | 0.643078    |
|                           | Inverse variance weighted | 36.14967           | 0.644267    |
| Paracentral               | MR-Egger                  | 43.53853           | 0.2843121   |
|                           | Inverse variance weighted | 44.18875           | 0.2991325   |
| Parahippocampal           | MR-Egger                  | 44.23944           | 0.2599963   |
|                           | Inverse variance weighted | 44.46003           | 0.2893824   |
| Pars opercularis          | MR-Egger                  | 40.94209           | 0.3852885   |
|                           | Inverse variance weighted | 43.29363           | 0.3326096   |
| Pars orbitalis            | MR-Egger                  | 46.3846            | 0.1940741   |
|                           | Inverse variance weighted | 46.82844           | 0.2125827   |
| Pars triangularis         | MR-Egger                  | 54.73514           | 0.04849656  |
|                           | Inverse variance weighted | 54.99075           | 0.05755383  |
| Pericalcarine             | MR-Egger                  | 40.9379            | 0.3854638   |

|                            |                           |          |             |
|----------------------------|---------------------------|----------|-------------|
|                            | Inverse variance weighted | 40.97734 | 0.4274514   |
| Postcentral                | MR-Egger                  | 72.35742 | 0.000925439 |
|                            | Inverse variance weighted | 72.37682 | 0.001294442 |
| Posterior cingulate        | MR-Egger                  | 39.18783 | 0.4614509   |
|                            | Inverse variance weighted | 39.65309 | 0.4857295   |
| Precentral                 | MR-Egger                  | 47.12074 | 0.1744296   |
|                            | Inverse variance weighted | 47.13811 | 0.2036735   |
| Precuneus                  | MR-Egger                  | 39.60568 | 0.4428657   |
|                            | Inverse variance weighted | 40.03772 | 0.4685824   |
| Rostral anterior cingulate | MR-Egger                  | 33.30739 | 0.7265343   |
|                            | Inverse variance weighted | 33.39219 | 0.760587    |
| Rostral middle frontal     | MR-Egger                  | 31.84448 | 0.7849585   |
|                            | Inverse variance weighted | 32.76124 | 0.7847206   |
| Superior frontal           | MR-Egger                  | 62.21916 | 0.01047296  |
|                            | Inverse variance weighted | 62.5689  | 0.0127607   |
| Superior parietal          | MR-Egger                  | 38.93501 | 0.4728037   |
|                            | Inverse variance weighted | 38.9376  | 0.5179703   |
| Superior temporal          | MR-Egger                  | 41.86421 | 0.3475959   |
|                            | Inverse variance weighted | 44.67028 | 0.2819567   |
| Supramarginal              | MR-Egger                  | 33.2165  | 0.7303263   |
|                            | Inverse variance weighted | 33.21675 | 0.7674103   |
| Temporal pole              | MR-Egger                  | 39.35957 | 0.4537835   |
|                            | Inverse variance weighted | 39.423   | 0.4960549   |
| Transverse temporal        | MR-Egger                  | 29.46499 | 0.86554     |
|                            | Inverse variance weighted | 29.54199 | 0.8875942   |

**Supplementary Table 6. MR sensitivity analysis of cortical surface area of cerebral functional area in heart failure patients.**

| Cerebral cortex           | Method                    | Cochran's Q | P          |
|---------------------------|---------------------------|-------------|------------|
| Bankssts                  | MR-Egger                  | 43.45859    | 0.2871696  |
|                           | Inverse variance weighted | 44.38683    | 0.2919947  |
| Caudal anterior cingulate | MR-Egger                  | 55.62494    | 0.04095567 |
|                           | Inverse variance weighted | 59.78143    | 0.02287035 |
| Caudal middle frontal     | MR-Egger                  | 43.39232    | 0.2895516  |
|                           | Inverse variance weighted | 44.80686    | 0.2771945  |
| Cuneus                    | MR-Egger                  | 50.20767    | 0.1077826  |
|                           | Inverse variance weighted | 50.20967    | 0.1292751  |
| Entorhinal                | MR-Egger                  | 50.44128    | 0.1037027  |
|                           | Inverse variance weighted | 50.75089    | 0.1186733  |
| Frontal pole              | MR-Egger                  | 59.94121    | 0.01713385 |
|                           | Inverse variance weighted | 60.56363    | 0.01948027 |
| Fusiform                  | MR-Egger                  | 53.95883    | 0.05602575 |
|                           | Inverse variance weighted | 55.56295    | 0.05183819 |
| Inferior parietal         | MR-Egger                  | 52.14915    | 0.07752271 |
|                           | Inverse variance weighted | 53.62679    | 0.07337278 |

|                            |                           |           |             |
|----------------------------|---------------------------|-----------|-------------|
| Inferior temporal          | MR-Egger                  | 52.0202   | 0.07928585  |
|                            | Inverse variance weighted | 52.24359  | 0.09296391  |
| Insula                     | MR-Egger                  | 28.86444  | 0.8826167   |
|                            | Inverse variance weighted | 30.694    | 0.8549859   |
| Isthmus cingulate          | MR-Egger                  | 89.33176  | 8.04E-06    |
|                            | Inverse variance weighted | 89.92571  | 1.05E-05    |
| Lateral occipital          | MR-Egger                  | 71.9915   | 0.00101626  |
|                            | Inverse variance weighted | 72.02536  | 0.001413118 |
| Lateral orbitofrontal      | MR-Egger                  | 47.4027   | 0.1673007   |
|                            | Inverse variance weighted | 47.40452  | 0.1962198   |
| Lingual                    | MR-Egger                  | 46.89388  | 0.1803229   |
|                            | Inverse variance weighted | 46.91982  | 0.2099263   |
| Medial orbitofrontal       | MR-Egger                  | 39.32461  | 0.4553414   |
|                            | Inverse variance weighted | 39.75916  | 0.4809858   |
| Middle temporal            | MR-Egger                  | 39.46136  | 0.4492581   |
|                            | Inverse variance weighted | 39.51635  | 0.4918601   |
| Paracentral                | MR-Egger                  | 53.83827  | 0.05728037  |
|                            | Inverse variance weighted | 53.84188  | 0.07065973  |
| Parahippocampal            | MR-Egger                  | 34.00666  | 0.6967528   |
|                            | Inverse variance weighted | 35.95928  | 0.6527204   |
| Pars opercularis           | MR-Egger                  | 58.4168   | 0.02353054  |
|                            | Inverse variance weighted | 58.53463  | 0.02937326  |
| Pars orbitalis             | MR-Egger                  | 39.98337  | 0.4262844   |
|                            | Inverse variance weighted | 41.14309  | 0.4203288   |
| Pars triangularis          | MR-Egger                  | 40.17411  | 0.417997    |
|                            | Inverse variance weighted | 41.0692   | 0.4234989   |
| Pericalcarine              | MR-Egger                  | 38.9605   | 0.4716557   |
|                            | Inverse variance weighted | 38.96237  | 0.516848    |
| Postcentral                | MR-Egger                  | 43.23858  | 0.2951222   |
|                            | Inverse variance weighted | 43.68739  | 0.3176415   |
| Posterior cingulate        | MR-Egger                  | 98.71798  | 4.41E-07    |
|                            | Inverse variance weighted | 100.06305 | 4.70E-07    |
| Precentral                 | MR-Egger                  | 58.99376  | 0.0208929   |
|                            | Inverse variance weighted | 61.353    | 0.01652484  |
| Precuneus                  | MR-Egger                  | 62.79128  | 0.009224499 |
|                            | Inverse variance weighted | 63.94157  | 0.009463078 |
| Rostral anterior cingulate | MR-Egger                  | 63.72689  | 0.00747466  |
|                            | Inverse variance weighted | 65.11466  | 0.007286857 |
| Rostral middle frontal     | MR-Egger                  | 30.68133  | 0.8268206   |
|                            | Inverse variance weighted | 31.8421   | 0.8177259   |
| Superior frontal           | MR-Egger                  | 38.32725  | 0.5003717   |
|                            | Inverse variance weighted | 45.43153  | 0.2560455   |
| Superior parietal          | MR-Egger                  | 36.7003   | 0.5752397   |
|                            | Inverse variance weighted | 37.00544  | 0.6058215   |
| Superior temporal          | MR-Egger                  | 55.883    | 0.03896919  |
|                            | Inverse variance weighted | 56.66679  | 0.04217886  |

|                     |                           |          |            |
|---------------------|---------------------------|----------|------------|
| Supramarginal       | MR-Egger                  | 31.81319 | 0.786142   |
|                     | Inverse variance weighted | 31.92403 | 0.8148943  |
| Temporal pole       | MR-Egger                  | 39.5041  | 0.4473617  |
|                     | Inverse variance weighted | 40.34132 | 0.4551645  |
| Transverse temporal | MR-Egger                  | 61.30767 | 0.01278561 |
|                     | Inverse variance weighted | 61.69167 | 0.01538625 |

---
